# Supplementary material for: Designed synthesis of Zr-based ceria–zirconia–neodymia composite with high thermal stability and its enhanced catalytic performance for Rh-only three-way catalyst
Source: Royal Society of Chemistry journal article supplement (doi:10.1039/c6cy01272h), 2016-01-01
Supplement: c6cy01272h1.pdf [file c6cy01272h1.pdf]

Supplementary Information for

**Designed synthesis of Zr-based ceria-zirconia-neodymia  
composite with highly thermal stability and its enhanced  
catalytic performance for Rh-only three-way catalyst**

*Su-Ning Wang<sup>a</sup>, Jian-Li Wang<sup>b,c</sup>, Wei-Bo Hua<sup>a</sup>, Meng-Meng Sun<sup>d</sup>, Zhong-Hua Shi<sup>b,c</sup>, Shan-Dong  
Yuan<sup>d</sup>, Lin Zhong<sup>a</sup>, Yao-Qiang Chen<sup>\*a,b,c,d</sup>*

*<sup>a</sup> College of Chemical Engineering, Sichuan University, Chengdu, Sichuan 610064, China.*

*<sup>b</sup> Key Laboratory of Green Chemistry & Technology, Ministry of Education, College of Chemistry,  
Sichuan University, Chengdu, Sichuan 610064, China.*

*<sup>c</sup> Center of Engineering of Environmental Catalytic Material, Chengdu, Sichuan 610064, China.*

*<sup>d</sup> Institute of New Energy and Low-carbon Technology, Sichuan University, Chengdu, Sichuan  
610064, China.*

*\*Corresponding author. Email: [nic7501@scu.edu.cn](mailto:nic7501@scu.edu.cn) (Prof. Dr. Yao-Qiang Chen)*

## **This Supplementary Information includes:**

Table S1. BET surface area for several advanced ceria-zirconia mixed oxides with different preparation methods and thermal treatment.

Table S2. Structural parameters of samples calcined at different temperatures.

Table S3. The reduction peak temperatures and quantitative analysis results of H<sub>2</sub>-TPR for the samples.

Table S4. The quantitative analysis results of OSC for the samples and the surface atomic ratios of Zr/Ce and Ce<sup>3+</sup> in Ce (%) derived from XPS analyses.

Table S5. The OSC for the samples pretreated in H<sub>2</sub> flowing at 950 °C for 1 h.

Table S6. Light-off temperatures ( $T_{50\%}$ ) of NO, CO and C<sub>3</sub>H<sub>8</sub> over catalysts.

Figure S1. TG/DTG/DSC curves of CZ/N235-70.

Figure S2. XRD diffraction patterns of dried precipitates, fresh samples and aged samples.

Figure S3. The illustrative crystallographic structure of cubic Ce<sub>0.6</sub>Zr<sub>0.4</sub>O<sub>2</sub>.

Figure S4. Multiples of crystal growth for the fresh and aged samples based on the corresponding crystallite size for dried materials.

Figure S5. Raman spectra of dried precipitates, fresh samples and aged samples.

Figure S6. The statistics of particle distribution of CZ/N235-600 (a) and CZ-600 (b).

Figure S7. FTIR spectra of samples treated at different temperatures.

Figure S8. H<sub>2</sub>-TPR profiles of the sample calcinated at 600 and 1000 °C.

Figure S9. H<sub>2</sub>-TPR profiles of the fresh and aged catalysts.

Figure S10. OSC values of the fresh and aged catalysts.

Figure S11. Rh dispersions of the fresh and aged catalysts.

Figure S12. Rh 3d XPS spectra of the fresh and aged catalysts.

Table S1. BET surface area for several advanced ceria-zirconia mixed oxides with different preparation methods and thermal treatment.

| Structure                                            | Preparation method                                                          | Thermal treatment                                                     | Surface area<br>(m <sup>2</sup> ·g <sup>-1</sup> ) | Reference      |
|------------------------------------------------------|-----------------------------------------------------------------------------|-----------------------------------------------------------------------|----------------------------------------------------|----------------|
| Ce <sub>0.15</sub> Zr <sub>0.85</sub> O <sub>2</sub> | Co-precipitation combined<br>with mechanical mixing of<br>N235              | 600 °C/3 h in air                                                     | 92                                                 | This work      |
|                                                      |                                                                             | 1000 °C/5 h in air                                                    | 31                                                 |                |
| Ce <sub>0.15</sub> Zr <sub>0.85</sub> O <sub>2</sub> | Co-precipitation                                                            | 600 °C/3 h in air                                                     | 71                                                 | This work      |
| Ce <sub>0.18</sub> Zr <sub>0.82</sub> O <sub>2</sub> |                                                                             | 1000 °C/5 h in air                                                    | 13                                                 |                |
| Ce <sub>0.65</sub> Zr <sub>0.35</sub> O <sub>2</sub> | Continuous hydrothermal<br>synthesis in supercritical water                 | 700 °C/5 h in air                                                     | 92                                                 | Reference [2]  |
|                                                      |                                                                             | 1000 °C/6 h in H <sub>2</sub><br>and 1000 °C/6 h<br>in O <sub>2</sub> | 20                                                 |                |
|                                                      |                                                                             |                                                                       |                                                    |                |
| Ce <sub>0.2</sub> Zr <sub>0.8</sub> O <sub>2</sub>   | Co-precipitation method<br>combined with supercritical<br>drying technology | 500 °C in air                                                         | 97                                                 | Reference [20] |
|                                                      |                                                                             | 1100 °C/4 h in air                                                    | 28                                                 |                |
| Ce <sub>0.68</sub> Zr <sub>0.32</sub> O <sub>2</sub> | CTAB-assisted precipitation<br>technique                                    | 900 °C/2 h in air                                                     | 40                                                 | Reference [30] |

|                                                      |                                                     |                    |     |                |
|------------------------------------------------------|-----------------------------------------------------|--------------------|-----|----------------|
| Ce-Zr-Pr-O <sub>2</sub><br>(Ce/Zr=1/8)               | Conventional co-precipitation<br>method             | 500 °C/4 h in air  | 100 | Reference [19] |
|                                                      |                                                     | 1100 °C/4 h in air | 10  |                |
| Ce <sub>0.67</sub> Zr <sub>0.33</sub> O <sub>2</sub> | Co-precipitation and<br>supercritical drying method | 600 °C/4 h in air  | 55  | Reference [15] |
|                                                      |                                                     | 1100 °C/4 h in air | 8   |                |
| CeZr <sub>2</sub> O <sub>x</sub>                     | Homogeneous precipitation<br>method                 | 500 °C/3 h in air  | 107 | Reference [5]  |

---

Table S2. Structural parameters of samples calcined at different temperatures.

| Sample       | Crystal form                                   | Crystallite size<br>(Å) | Weight (%) | $a = b$ (Å) | $c$ (Å) | $V$ (Å <sup>3</sup> ) | $R_{\text{wp}}$ (%) |
|--------------|------------------------------------------------|-------------------------|------------|-------------|---------|-----------------------|---------------------|
| CZ-70        | $c\text{-Ce}_{0.6}\text{Zr}_{0.4}\text{O}_2$   | 29                      | -          | 5.307       | 5.307   | 149.468               | -                   |
| CZ/N235-70   | $c\text{-Ce}_{0.6}\text{Zr}_{0.4}\text{O}_2$   | 33                      | -          | 5.308       | 5.308   | 149.552               | -                   |
| CZ-600       | $t\text{-Ce}_{0.15}\text{Zr}_{0.85}\text{O}_2$ | 81                      | 100        | 3.644       | 5.209   | 69.169                | 8.45                |
| CZ/N235-600  | $t\text{-Ce}_{0.15}\text{Zr}_{0.85}\text{O}_2$ | 69                      | 100        | 3.648       | 5.219   | 69.454                | 7.80                |
| CZ-1000      | $t\text{-Ce}_{0.18}\text{Zr}_{0.82}\text{O}_2$ | 154                     | 94.6       | 3.686       | 5.213   | 70.827                | 6.76                |
|              | $t\text{-ZrO}_2$                               |                         | 5.4        | 3.653       | 5.202   | 69.418                |                     |
| CZ/N235-1000 | $t\text{-Ce}_{0.15}\text{Zr}_{0.85}\text{O}_2$ | 125                     | 100        | 3.649       | 5.228   | 69.612                | 8.26                |

Table S3. The reduction peak temperatures and quantitative analysis results of H<sub>2</sub>-TPR for the samples.

| Sample       | Temperature of<br>reduction peak (°C) | Total H <sub>2</sub> consumption<br>(μmol·g <sup>-1</sup> ) | Reduction ratio<br>(%) <sup>a</sup> |
|--------------|---------------------------------------|-------------------------------------------------------------|-------------------------------------|
| CZ-600       | 583                                   | 405                                                         | 70.43                               |
| CZ/N235-600  | 563                                   | 422                                                         | 73.39                               |
| CZ-1000      | 699                                   | 334                                                         | 58.09                               |
| CZ/N235-1000 | 585                                   | 380                                                         | 66.09                               |

a: The ratio between experimental total H<sub>2</sub> consumption and the theoretical H<sub>2</sub> consumption which is calculated assuming that all Ce species are in oxidized state (Ce<sup>4+</sup>) before H<sub>2</sub>-TPR test and can be totally reduced to Ce<sup>3+</sup>.

Table S4. The quantitative analysis results of OSC for the samples and the surface atomic ratios of Zr/Ce and Ce<sup>3+</sup> in Ce (%) derived from XPS analyses.

| Sample       | OSC<br>( $\mu\text{mol}\cdot\text{g}^{-1}$ ) | OSC<br>(mol O <sub>2</sub> /mol<br>CeO <sub>2</sub> ) | Oxidation ratio<br>(%) <sup>b</sup> | Zr/Ce | Ce <sup>3+</sup> in Ce<br>(%) |
|--------------|----------------------------------------------|-------------------------------------------------------|-------------------------------------|-------|-------------------------------|
| CZ-600       | 132                                          | 0.1148                                                | 45.92                               | 5.64  | 16.92                         |
| CZ/N235-600  | 143                                          | 0.1243                                                | 49.72                               | 5.62  | 23.80                         |
| CZ-1000      | 74                                           | 0.0643                                                | 25.72                               | 6.29  | 11.70                         |
| CZ/N235-1000 | 138                                          | 0.1200                                                | 48.00                               | 5.69  | 21.77                         |

b: The ratio between experimental OSC (expressed as mol O<sub>2</sub>/mol CeO<sub>2</sub>) and the theoretical OSC value (0.25 mol O<sub>2</sub>/mol CeO<sub>2</sub>).

Table S5. The OSC for the samples pretreated in H<sub>2</sub> flowing at 950 °C for 1 h.

| Sample       | OSC<br>( $\mu\text{mol}\cdot\text{g}^{-1}$ ) |
|--------------|----------------------------------------------|
| CZ-600       | 218                                          |
| CZ/N235-600  | 260                                          |
| CZ-1000      | 173                                          |
| CZ/N235-1000 | 245                                          |

Table S6. Light-off temperatures ( $T_{50\%}$ ) of NO, CO and C<sub>3</sub>H<sub>8</sub> over catalysts.

| Catalyst     | NO              | CO              | C <sub>3</sub> H <sub>8</sub> |
|--------------|-----------------|-----------------|-------------------------------|
|              | $T_{50\%}$ (°C) | $T_{50\%}$ (°C) | $T_{50\%}$ (°C)               |
| Rh/CZ-f      | 204             | 205             | 347                           |
| Rh/CZ/N235-f | 168             | 171             | 278                           |
| Rh/CZ-a      | 278             | 280             | -                             |
| Rh/CZ/N235-a | 229             | 235             | -                             |

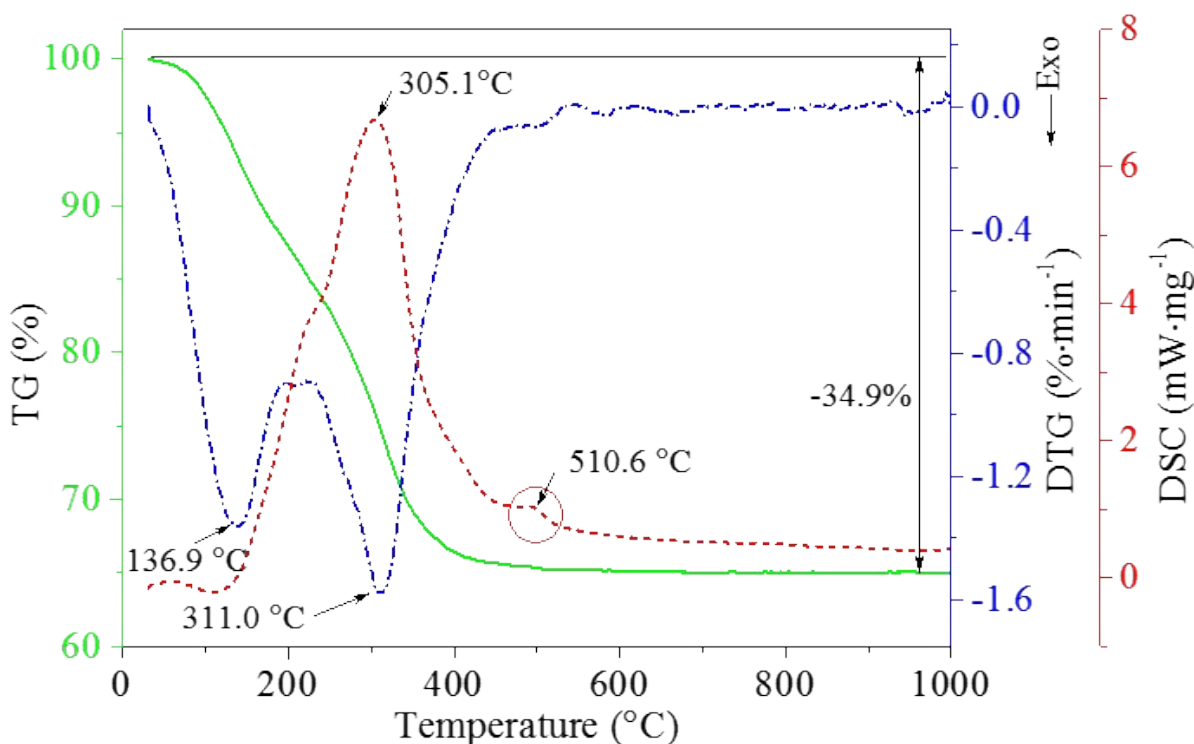

Figure S1. TG/DTG/DSC curves of CZ/N235-70.

Figure S1 shows the TG/DTG/DSC curves of the CZ/N235-70. A weight loss of 34.9 % is calculated from TG characterization between room temperature and 1000 °C. It can be found that DTG curve displays two mass loss stages, corresponding with peaks located at about 136.9 and 311.0 °C, respectively. The peak observed at 136.9 °C could be attributed to the loss of water. While a stronger plateau at approximately 311.0 °C is probably assigned to the decomposition of carbonates, hydroxides and organics, which is coincident with the endothermic peak found in DSC profile. The other endothermic peak centered at about 510.6 °C is not associated with weight loss, suggesting the phase transformation of materials.

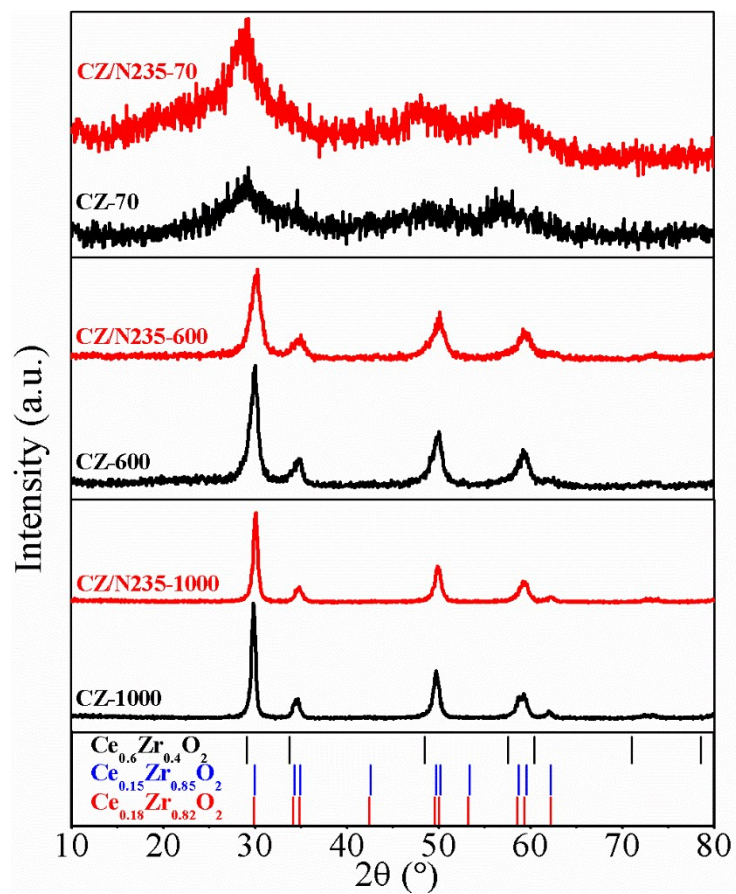

Figure S2. XRD diffraction patterns of dried precipitates, fresh samples and aged samples.

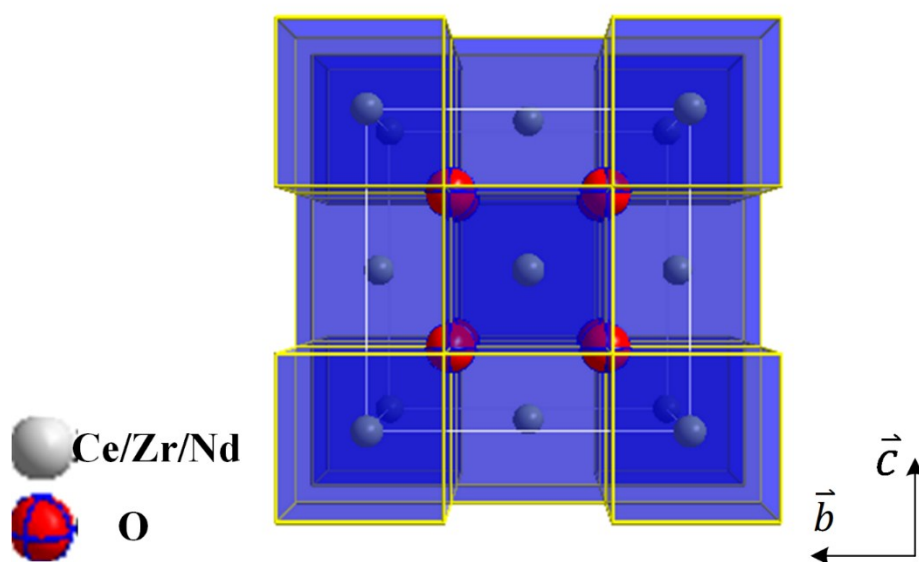

Figure S3. The illustrative crystallographic structure of cubic  $\text{Ce}_{0.6}\text{Zr}_{0.4}\text{O}_2$ .

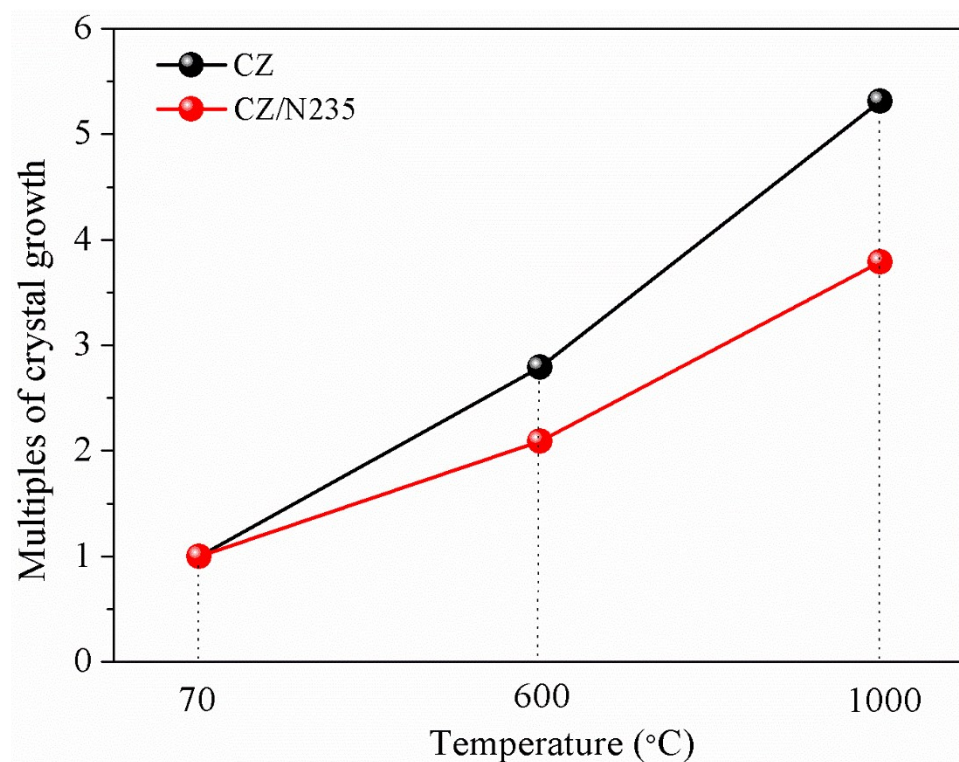

Figure S4. Multiples of crystal growth for the fresh and aged samples based on the corresponding crystallite size for dried materials.

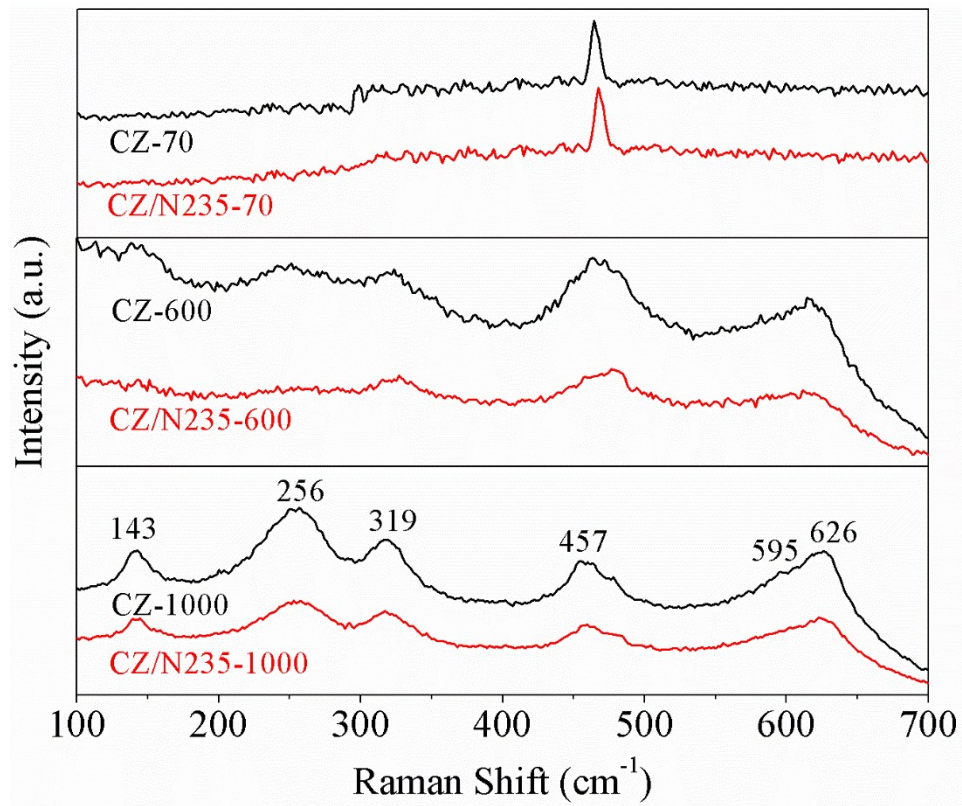

Figure S5. Raman spectra of dried precipitates, fresh samples and aged samples.

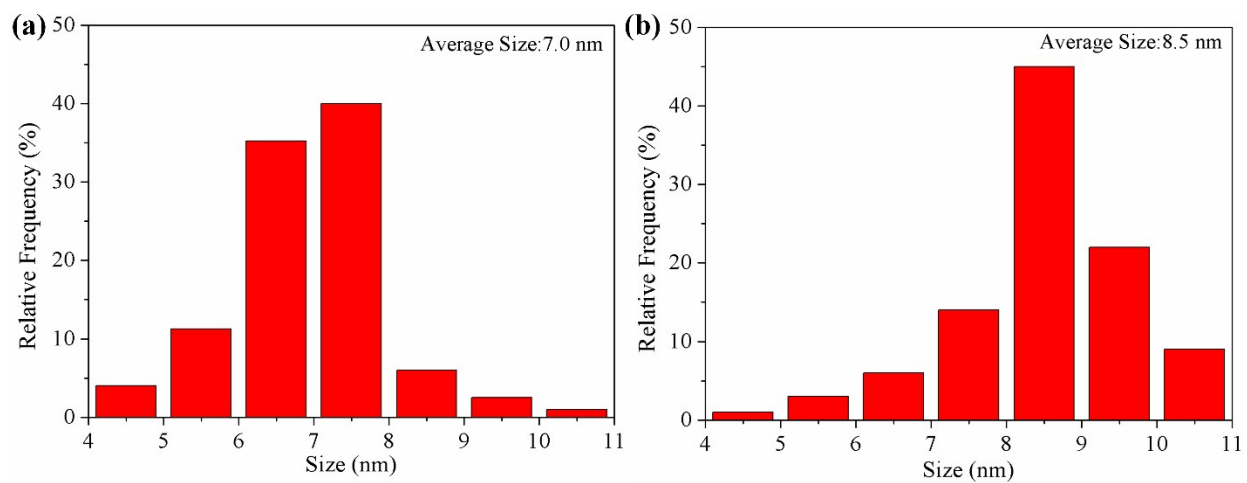

Figure S6. The statistics of particle distribution of CZ/N235-600 (a) and CZ-600 (b).

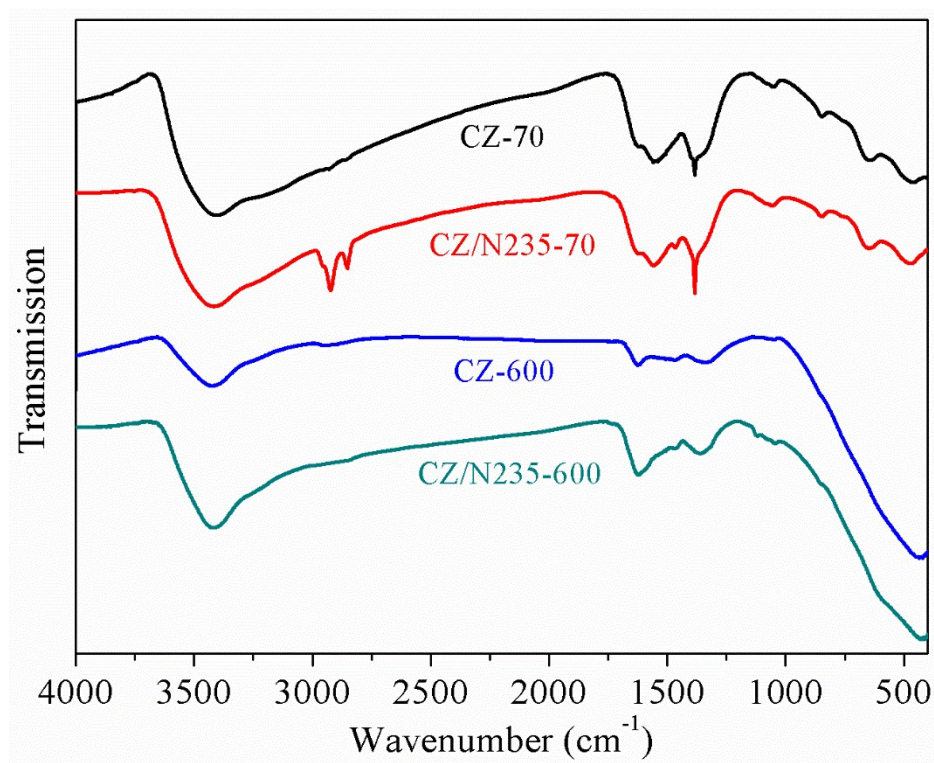

Figure S7. FTIR spectra of samples treated at different temperatures.

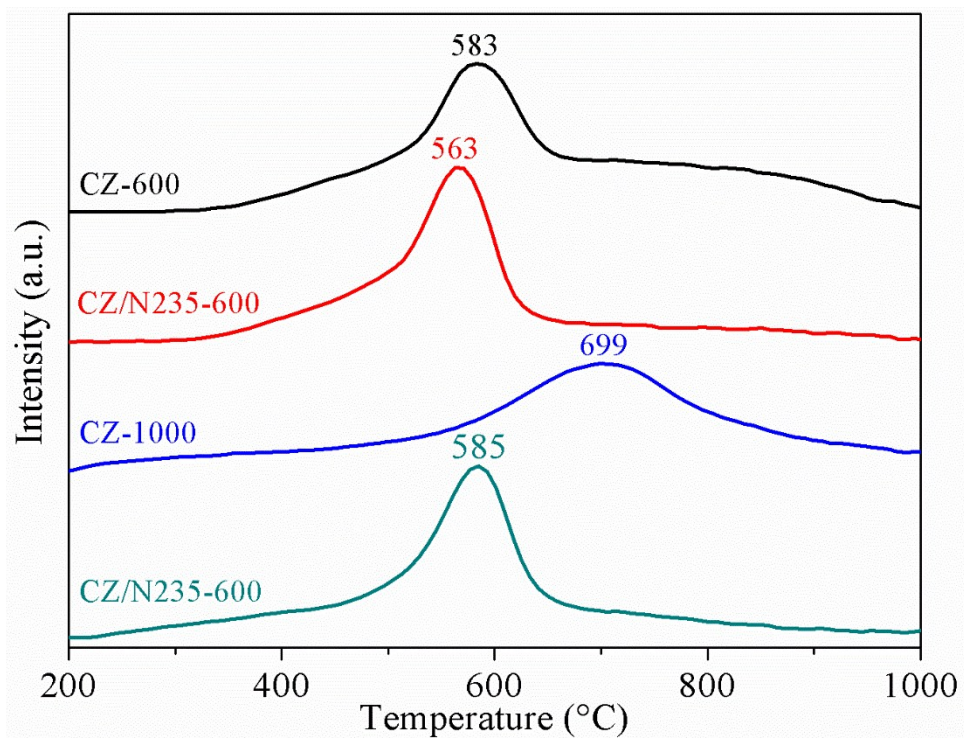

Figure S8. H<sub>2</sub>-TPR profiles of the sample calcinated at 600 and 1000 °C.

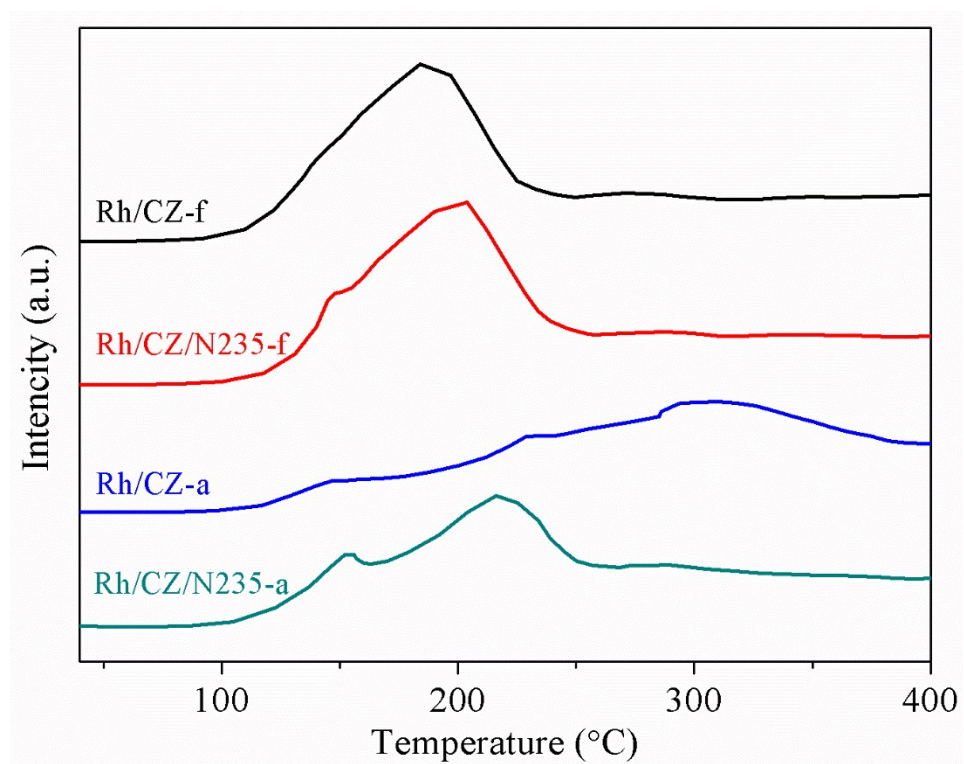

Figure S9. H<sub>2</sub>-TPR profiles of the fresh and aged catalysts.

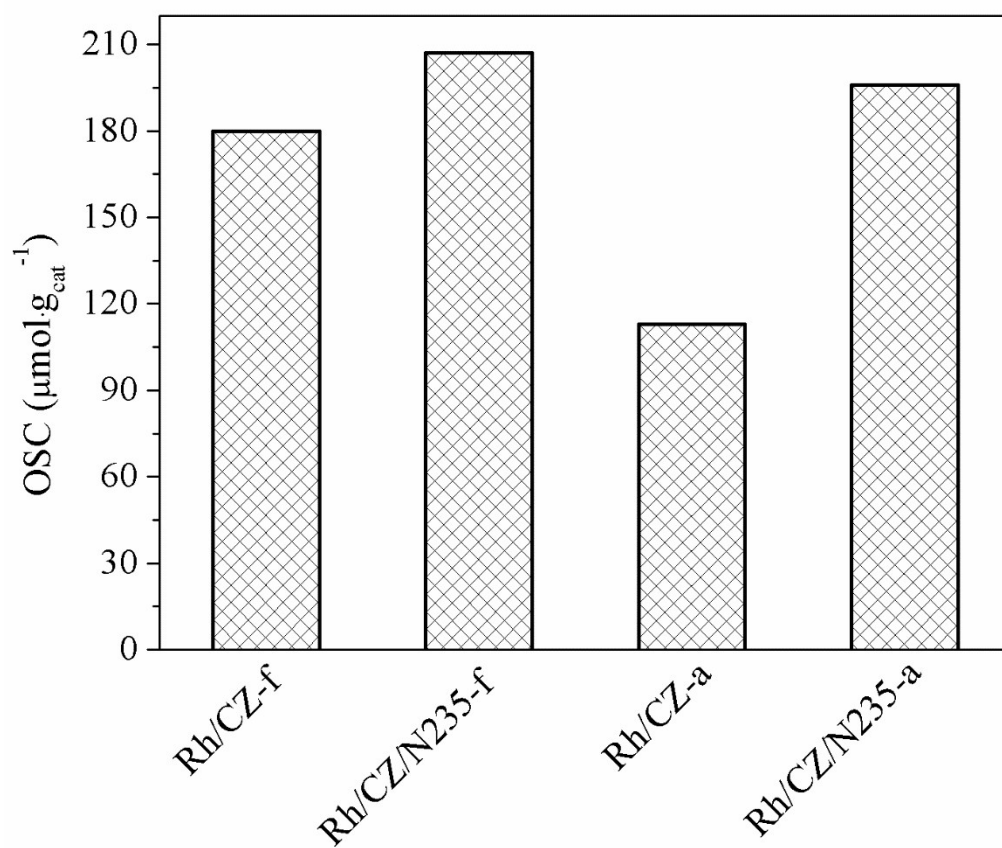

Figure S10. OSC values of the fresh and aged catalysts.

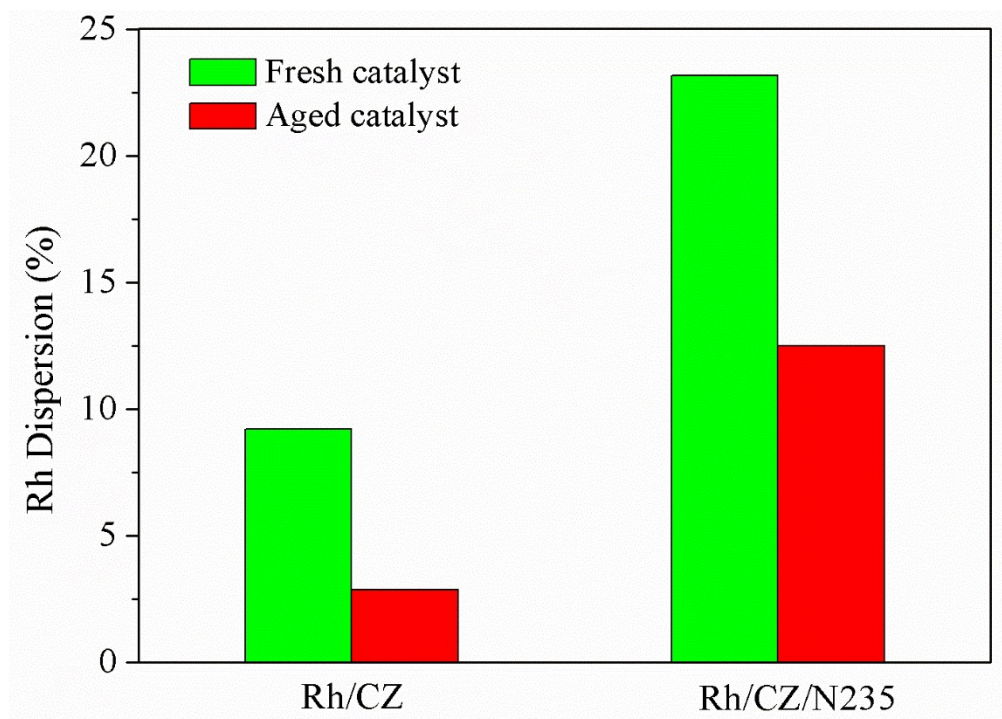

Figure S11. Rh dispersions of the fresh and aged catalysts.

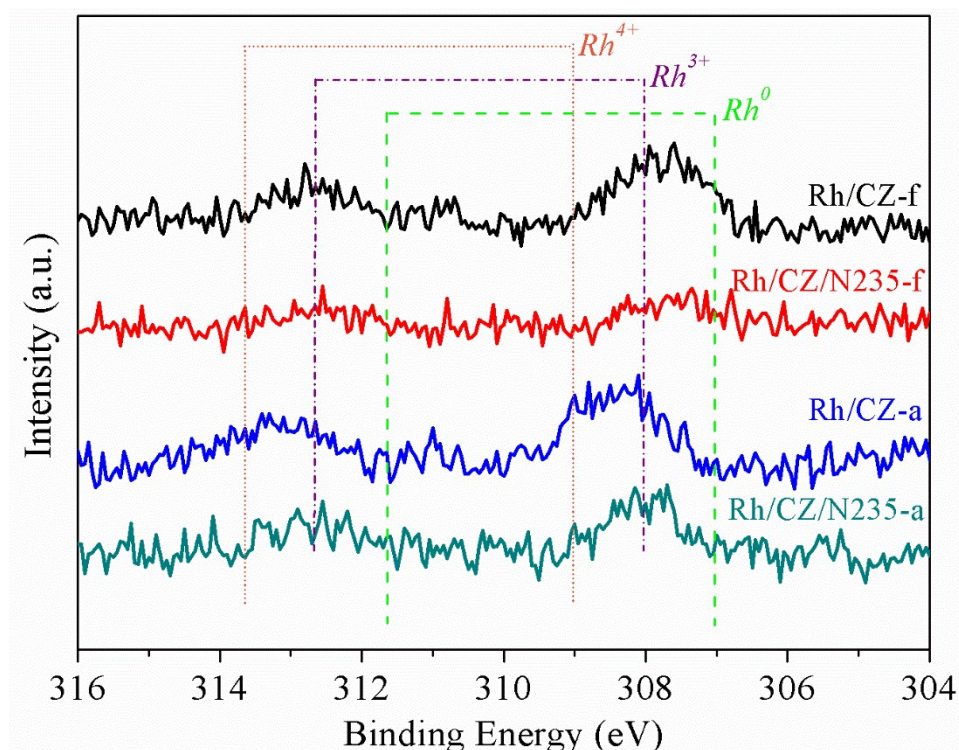

Figure S12. Rh 3d XPS spectra of the fresh and aged catalysts.

The spectra of Rh ( $3d_{5/2}$ ,  $3d_{3/2}$ ) for fresh and aged catalysts are shown in Figure S12. For fresh catalysts, faint peaks attributed to  $Rh^0$  are detected in a fashion at approximately 307 eV, demonstrating the presence of slight metallic Rh. Prominent peaks at about 308 eV ( $Rh\ 3d_{5/2}$ ) could be observed, which is in accordance with the literature data for  $Rh_2O_3$ .<sup>1, 2</sup> Upon aging treatment, the peaks of  $Rh\ 3d_{5/2}$  are shifted to higher binding energies, especially Rh/CZ-a, indicating the formation of more  $RhO_2$  on the surface of Rh/CZ-a.<sup>3</sup> According to the references,<sup>3-5</sup> the presence of  $RhO_2$ , which is hard to reduce to the active state, will result in deteriorated catalytic property for the aged catalysts. So Rh/CZ/N235-a may have a superior catalytic performance due to its lower amount of  $RhO_2$ .

## References

1. K. Dohmae, T. Nonaka and Y. Seno, *Surf. Interface Anal.*, 2005, **37**, 115-119.
2. Z. Weng-Sieh, R. Gronsby and A.T. Bell, *J. Catal.*, 1997, **170**, 62-74.
3. S. Suhonen, M. Valden, M. Hietikko, R. Laitinen, A. Savimäki and M. Härkönen, *Appl. Catal., A*, 2001, **218**, 151-160.
4. U. Lassi, R. Polvinen, S. Suhonen, K. Kallinen, A. Savimäki, M. Härkönen, M. Valden and R. L. Keiski, *Appl. Catal., A*, 2004, **263**, 241-248.
5. B. Zhao, R. Ran, Y. Cao, X. Wu, D. Weng, J. Fan and X. Wu, *Appl. Surf. Sci.*, 2014, **308**, 230-236.
